# Supplementary material for: A mouse model of cardiac immunoglobulin light chain amyloidosis reveals insights into tissue accumulation and toxicity of amyloid fibrils
Source: Springer Nature journal article supplement (doi:10.1038/s41467-025-58307-2), 2025-03-27
Supplement: MOESM1 [file 41467_2025_58307_MOESM1_ESM.pdf]

## **SUPPLEMENTARY INFORMATION**

**Supplementary tables 1-3**

**Supplementary figures 1-6**



## Supplemental tables

**Table S1: DEG genes between AL-  $\lambda$ S-DH and DH mice**

| Gene   | Log FC | FDR    | Description                                                                                                                                                                                                         |
|--------|--------|--------|---------------------------------------------------------------------------------------------------------------------------------------------------------------------------------------------------------------------|
| Osbp13 | 1.72   | 0.0007 | Encodes one of the members of the Oxysterol-Binding protein family, an intracellular lipid receptor family involved in the maintenance of cholesterol levels in the organism                                        |
| Snx10  | -1.17  | 0.0083 | Encodes a member of the Sortin Nexin family, involved in intracellular trafficking in endosomes through their binding with phosphoinositide                                                                         |
| Pyurf  | -1.77  | 0.0023 | Encodes for the PIGY Upstream Open Reading Frame, an S-adenosylmethionine-dependent methyltransferase chaperone involved in the stabilization of the coenzyme Q components during its biosynthesis in mitochondria. |

**Table S2: cardiac and fibrosis-related DEG**

|        | ALvsCtrl |          | ALvsLS  |        |
|--------|----------|----------|---------|--------|
|        | Log2 FC  | FDR      | Log2 FC | FDR    |
| Nmrk2  | 3.91     | 0.0007   | 3.44    | 0.0062 |
| Irf7   | 2.09     | 0.0033   | 3.45    | 0.0011 |
| Gpnmb  | 4.12     | 1.85E-05 | 3.47    | 0.0001 |
| Mmp12  | 7.6      | 0.0026   | 8.17    | 0.0098 |
| Lgals3 | 2.7      | 0.0001   | 4.09    | 0.0002 |
| Ltbp2  | 2.71     | 0.0029   | 3.52    | 0.0058 |
| Timp1  | 2.63     | 0.0094   | 3.74    | 0.0129 |
| Nppa   | 3.58     | 0.0021   | 1.992   | 0.095  |

**Table S3: List of antibodies used in the study**

| Antibody       | Reactivity | Clone                                           | Source         | Conjugate                         | Dilution | Applications       |
|----------------|------------|-------------------------------------------------|----------------|-----------------------------------|----------|--------------------|
| Anti-B220      | Mouse      | Clone RA3-6B2 (Becton Dickinson #562922)        | Rat            | BV421                             | 1/100    | Flow cytometry     |
| Anti-CD138     | Mouse      | Clone 281-2 (BD Biosciences #558626)            | Rat            | APC                               | 1/100    | Flow cytometry     |
| Anti-human VL6 | Human      | Monoclonal (from A. Solomon's lab)              | Mouse          | Unconjugated                      | 1/200    | Western-Blot       |
| Anti-lambda    | Human      | Polyclonal (southernBiotech #2070-01, #2070-04) | Goat           | Unconjugated or AP                | 1/1000   | ELISA              |
| Anti-lambda    | Human      | Polyclonal (Dako #A0194)                        | Goat           | Unconjugated, HRP, gold particles | 1/1000   | Western Blot       |
| Anti-lambda    | Human      | Polyclonal (Dako, #F0435)                       | Rabbit (Fab'2) | FITC                              | 1/2000   | Flow cytometry+ IF |
| Anti-lambda    | Human      | Clone [4C2] (Abcam, #ab77275)                   | Mouse          | FITC                              | 1/50     | IF                 |
| Anti-IgG       | Rabbit     | Polyclonal (Beckman Coulter, #4050-05)          | Goat           | HRP                               | 1/2000   | Western-Blot       |
| Anti-IgG       | Mouse      | Polyclonal (Beckman Coulter #1031-05)           | Goat           | HRP                               | 1/2000   | Western-Blot       |
| Anti-SAA1+SAA2 | Mouse      | Polyclonal (Abcam, #ab199030)                   | Rabbit         | Unconjugated                      | 1/120    | IF                 |
| Anti-ApoA2     | Mouse      | Polyclonal (AbClonal, #A14690)                  | Rabbit         | Unconjugated                      | 1/100    | IF                 |
| Anti-IgG       | Rabbit     | Polyclonal (Molecular probes #A21245)           | Goat           | AF647                             | 1/100    | IF                 |
| Anti-SAP       | Mouse      | Clone 300103, (R&D Systems #MAB2556)            | Rat            | Unconjugated                      | 1/100    | IF                 |
| Anti-IgG       | Rat        | Polyclonal (Molecular probes #A11081)           | Goat           | AF546                             | 1/100    | IF                 |



## **Supplemental figures**

Fig. S1

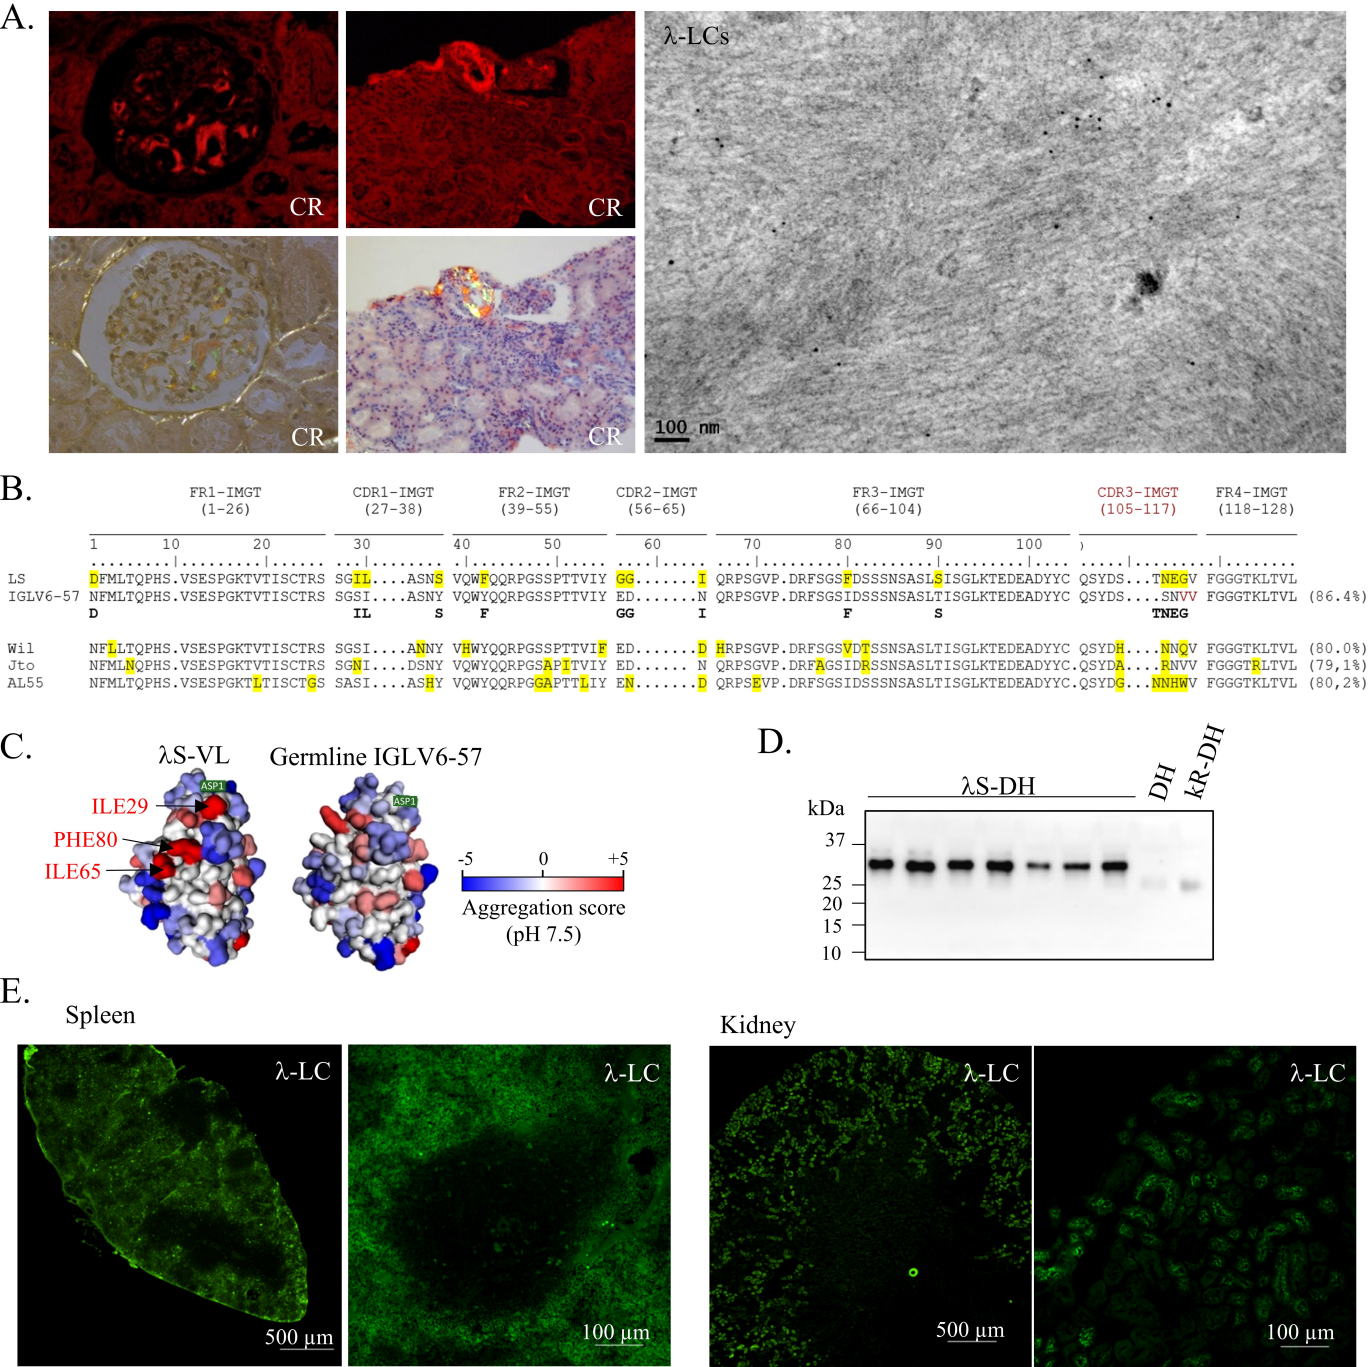

**Supplemental figure 1: Characterization of the λS-LC.** (A) Kidney biopsy from the patient λS (λS-PT) showing the Congo Red (CR) staining in fluorescence (top left) and its birefringence under polarized light (bottom left) in a glomerulus and in a blood vessel. The characterization of the deposits was performed by immunoelectron microscopy with anti λ-LCs gold-labeled antibody (right). (B) Amino acid sequence alignment between the λS-LC (LS) and the germline sequence IGLV6-57 according to the IMGT sequence. Other LCs from the same family were also aligned to our sequence (Wil, Jto and AL55). Mutated amino acids are indicated in yellow, with the percentage of shared sequence is indicated for each one of the alignments. (C) *In silico* analysis of the structure of λS-VL sequence with Aggrescan4D software (<https://biocomp.chem.uw.edu.pl/a4d/>) showed three mutations towards hydrophobic amino acids (Ile29, Ile65 and Phe80) that were absent in the germline sequence Vλ6-57 (PDB: 2W0K). The green squares correspond to the Asp1 (N-terminal). The aggregation score is given at pH 7.5. (D) Confirmation of the presence of the λS-LCs in the serum of our λS-DH transgenic mice (n=7) by Western Blot with an antibody recognizing the human Vλ6-57 LCs, and the absence of this human LC in the serum of controls DH-LMP2A (DH) and κR-DH mice. (E) Physiological detection of human λ-LCs in the spleen and the kidney of λS-DH mice (bright green staining), consistent with the production and the reabsorption of LCs, respectively.

Fig. S2

A.

| Variable Domain  |                                                                                                                  |
|------------------|------------------------------------------------------------------------------------------------------------------|
| $\lambda$ S-LC   | DFMLTQPHSVSESPGKTVTISCTRSSGILASNSVQWFQQRPGSSPTTVIYGGIQRPSGVPDRFSGSFDSSSNSASLSISGLKTEADYYCQSYDSTNEGVSFGGGTKLTVL   |
| r $\lambda$ S-LC | DFMLTQPHSVSESPGKTVTISCTRSSGILASNSVQWFQQRPGSSPTTVIYGGIQRPSGVPDRFSGSFDSSSNSASLSISGLKTEADYYCQSYDSTNEGVSFGGGTKLTVL   |
| r $\lambda$ S-VL | STDFMLTQPHSVSESPGKTVTISCTRSSGILASNSVQWFQQRPGSSPTTVIYGGIQRPSGVPDRFSGSFDSSSNSASLSISGLKTEADYYCQSYDSTNEGVSFGGGTKLTVL |
| Constant Domain  |                                                                                                                  |
| $\lambda$ S-LC   | GQPKAAPSVTLFPPSSEELQANKATLVCLISDFYPGAVTVAWKADSSPVKAGVETTTPSKQSNNKYAASSYLSLTPEQWKSHKSYSCQVTHEGSTVEKTVAPTECS       |
| r $\lambda$ S-LC | GQPKAAPSVTLFPPSSEELQANKATLVCLISDFYPGAVTVAWKADSSPVKAGVETTTPSKQSNNKYAASSYLSLTPEQWKSHKSYSCQVTHEGSTVEKTVAPTECS       |
| r $\lambda$ S-VL | .....                                                                                                            |

B.

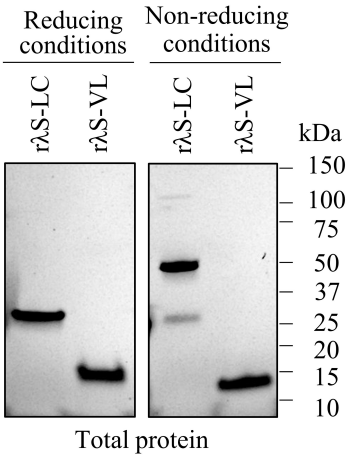

C.

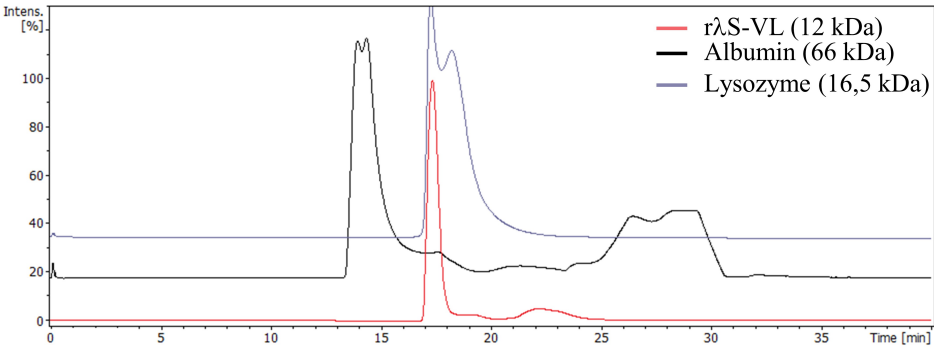

**Supplemental figure 2: Analysis of recombinant  $\lambda$ S proteins.** (A) Alignment of the deduced aminoacid sequences of the patient's  $\lambda$ S-LC and the recombinant proteins r $\lambda$ S-LC and r $\lambda$ S-VL. (B) SDS-PAGE of the purified recombinant  $\lambda$ S proteins, the full-length LC (r $\lambda$ S-LC, ~25kDa) and its variable domain (r $\lambda$ S-VL, ~12kDa) under reducing and non-reducing conditions. Total protein was visualized by the StainFree technology (Biorad). (C) Size exclusion chromatography of the r $\lambda$ S-VL confirmed that there were no aggregated forms of the r $\lambda$ S-VL in our samples. Lysozyme (~16.5kDa) and albumin (~66kDa) were used as size standards.



Fig. S3

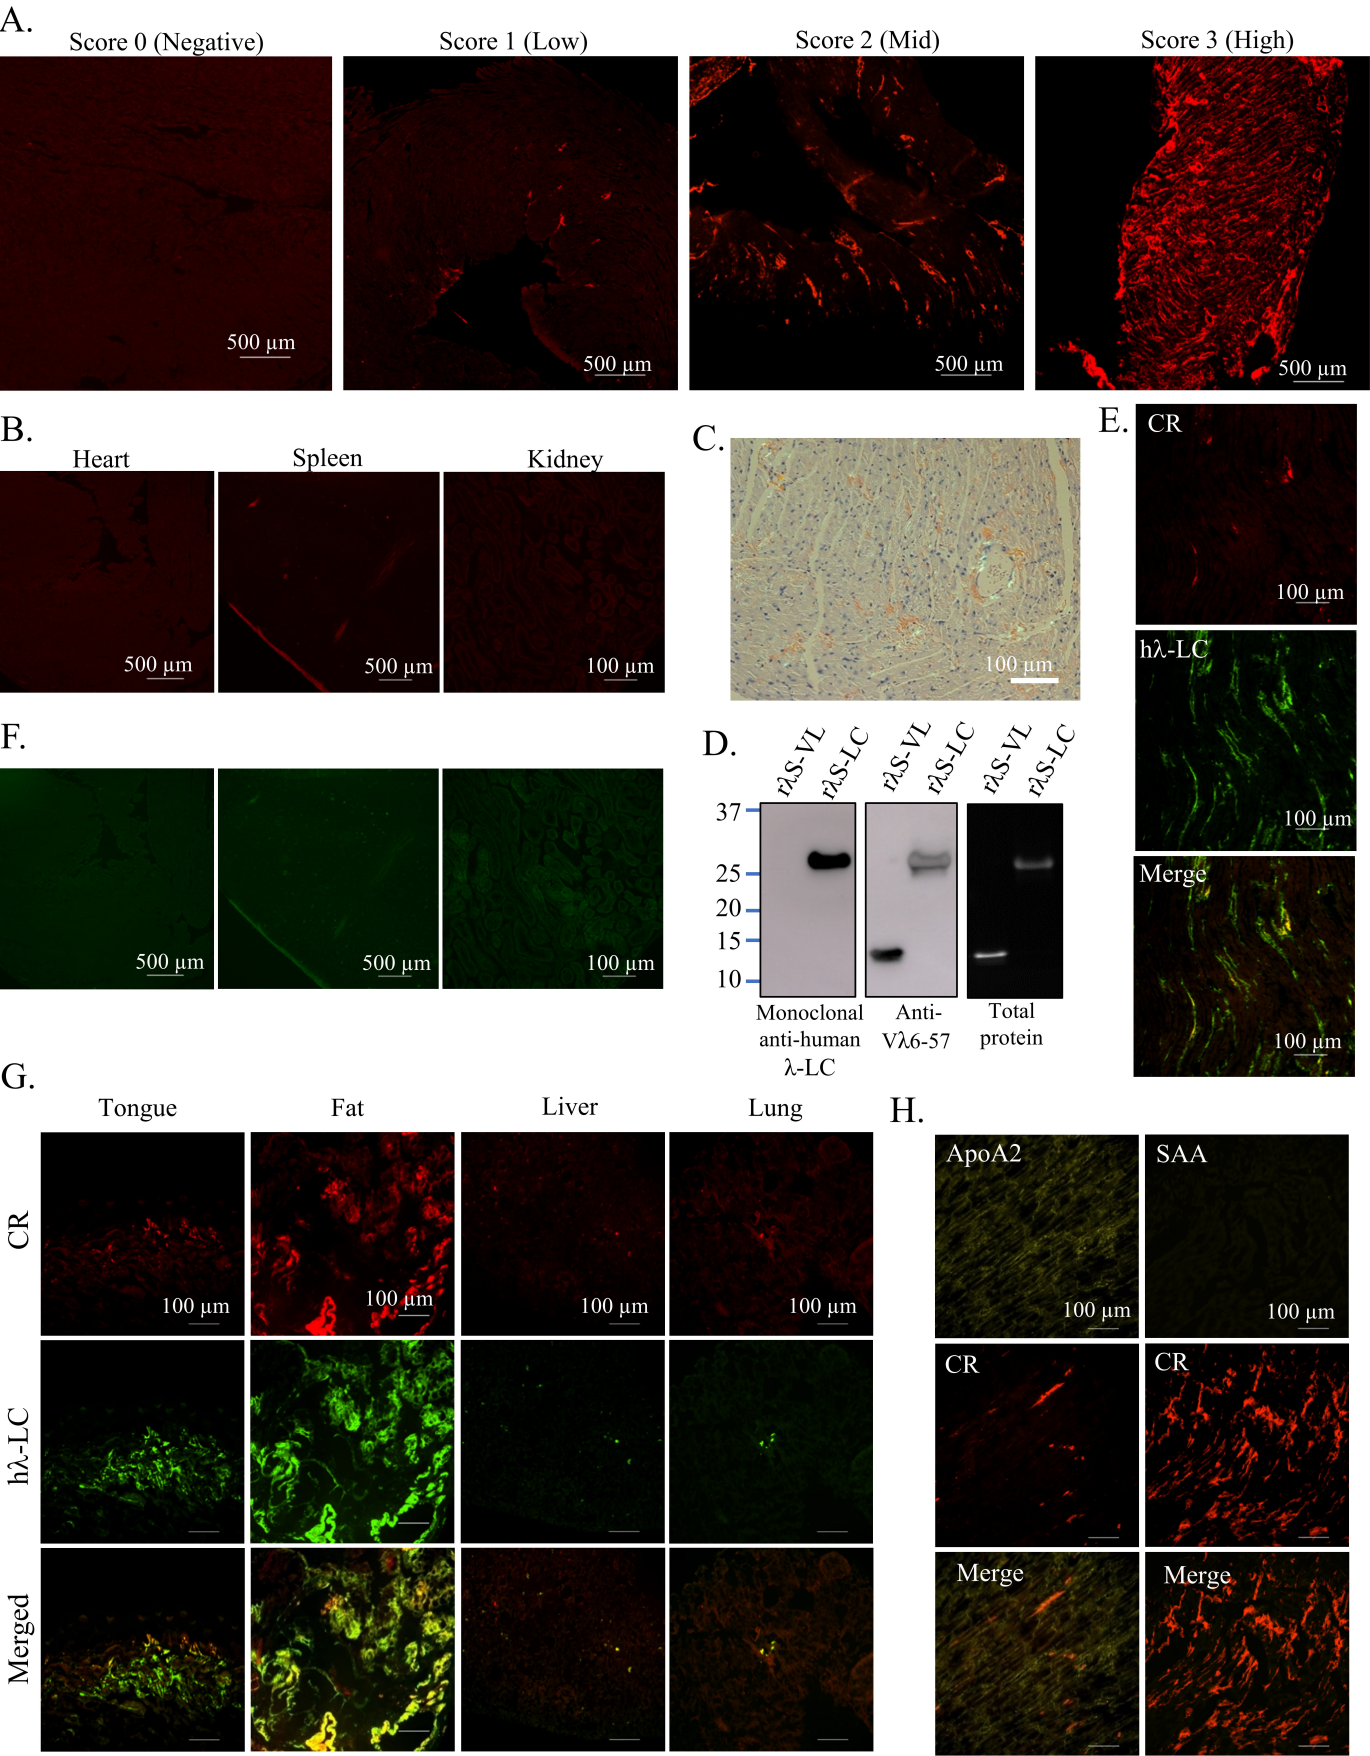

**Supplemental figure 3: Amyloid deposits in  $\lambda$ S-DH mice.** (A) Representative images of the amyloidosis score in the heart of the  $\lambda$ S-DH mice according to the CR-stained deposits in fluorescence. “negative”, or score 0, corresponds to the total absence of CR staining. “Low”, or score 1, corresponds to one of some focal deposits within the myocardium or/and blood vessels. “Mid”, or score 2, corresponds to some diffuse deposits within the myocardium. “High”, or score 3, corresponds to the diffuse deposits throughout the myocardium. (B) Representative image of CR staining in a control mouse (n=29) after induction using the same protocol as for  $\lambda$ S-DH mice. (C) Hematoxylin-Eosin and CR staining on the heart of a score 3 mouse showing the absence of immune cells infiltration around the deposits. (D) Western blot using the monoclonal anti-human  $\lambda$ LCs on the recombinant  $\lambda$ S proteins (full length r $\lambda$ S-LC and its isolated variable domain r $\lambda$ S-VL) that shows the specificity of this antibody for the constant domain of LCs (left). Western blot with the anti-V $\lambda$ 6-57 antibody (middle) and the total protein (right) are shown as controls (E) CR and the h $\lambda$ -LC fluorescence in the heart of score 1  $\lambda$ S-DH mice, are colocalized, but more extended h $\lambda$ -LC can be observed in the intercellular spaces surrounding the CR positive areas. (F) h $\lambda$ -LC staining in mice tissues from (B). (G) CR and h $\lambda$ -LC fluorescence staining in other tissues of  $\lambda$ S-DH mice, such as the tongue, liver, fat and lung (n=3). Representative image of a score 2 mouse  $\lambda$ S-DH. (H) Representative images of Apo-AII (n=2) and SAA (n=5) immunostaining in hearts of a score 1 and score 2  $\lambda$ S-DH mice, respectively.

**Fig. S4**

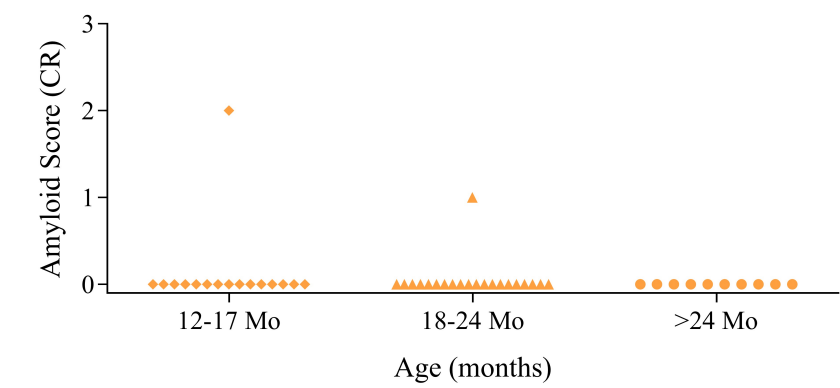

**Supplemental figure 4: Rare spontaneous amyloidosis in the  $\lambda$ S-DH mice.** Spontaneous amyloidosis occurring in the 47-mice cohort analyzed after 12 months (n=16 at 12-18 months (Mo), n=21 at 18-24 months and n=10 at >24 months). Two mice from the cohort developed AL amyloidosis spontaneously at 14 and 18 months. The cardiac score of these mice was evaluated at 2 and 1 respectively.

Fig. S5

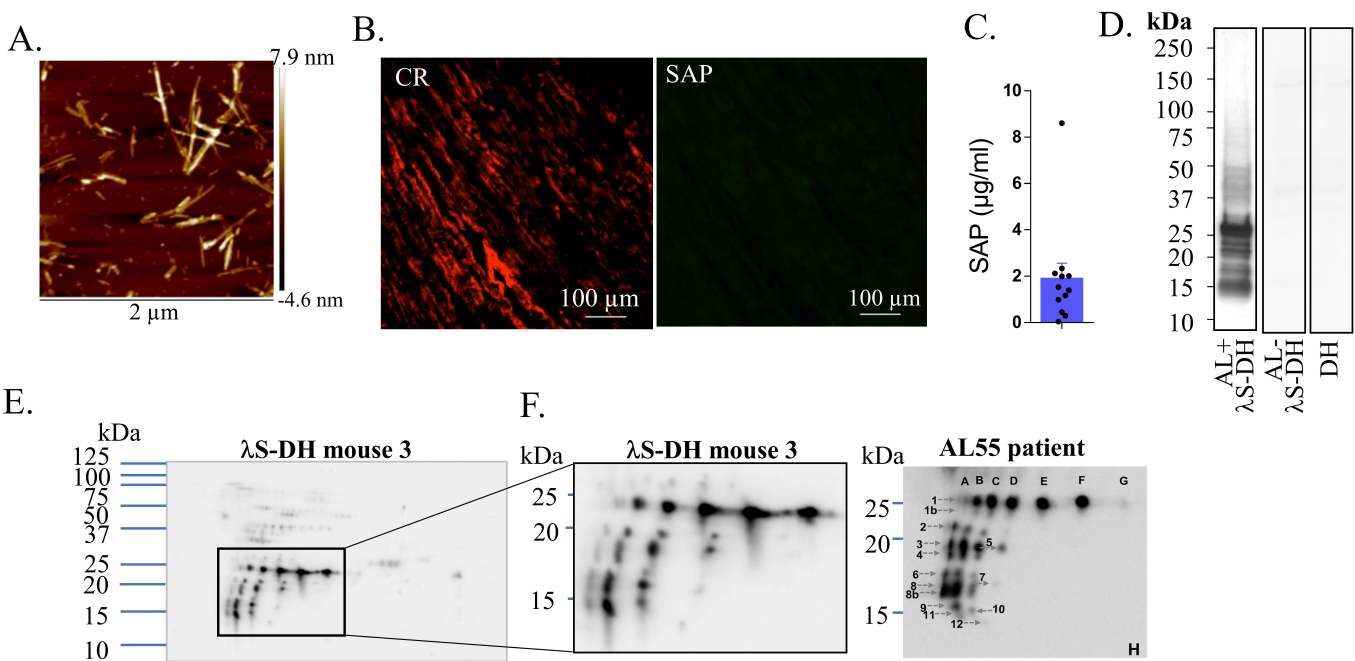

**Supplemental figure 5: LC fragmentation patterns in  $\lambda$ S-DH mice, control mice and human.** (A) Representative Atomic Force Microscopy image of the presence of fibrils samples upon purification with Pras protocol<sup>55</sup> from mice cardiac tissue (n=3). (B) Representative images of SAP immunostaining in hearts of AL-positive mice (n=4). (C) Serum dosage of the circulating serum amyloid P component (SAP) in the transgenic  $\lambda$ S-DH mice (2-6 months old; n=12). Representation of single values with mean (blue bar)  $\pm$  SD. (D) Representative western blotting analysis with a polyclonal antibody against the h $\lambda$ -LCs of the insoluble material enriched from the heart of amyloid-positive (AL+  $\lambda$ S-DH, n=3) and amyloid-negative (AL-  $\lambda$ S-DH, n=1, and DH, n=1) mice. (E) Analysis of deposited light chains in an amyloid-positive mouse by 2D-PAGE and 2D western blotting as in (Fig. 5D). The boxed region in mouse 3 matches the region shown in (F). (F) 2D western blotting analysis on *ex vivo* fibril-constituting LCs from cardiac tissue extracted from a  $\lambda$ S-DH mouse from (E) (left) and, for comparison, an AL patient with an IGLV6-57 LC (AL55) (right). Adapted with permission from Mazzini et al, FEBS, 2021<sup>12</sup>.

Fig. S6

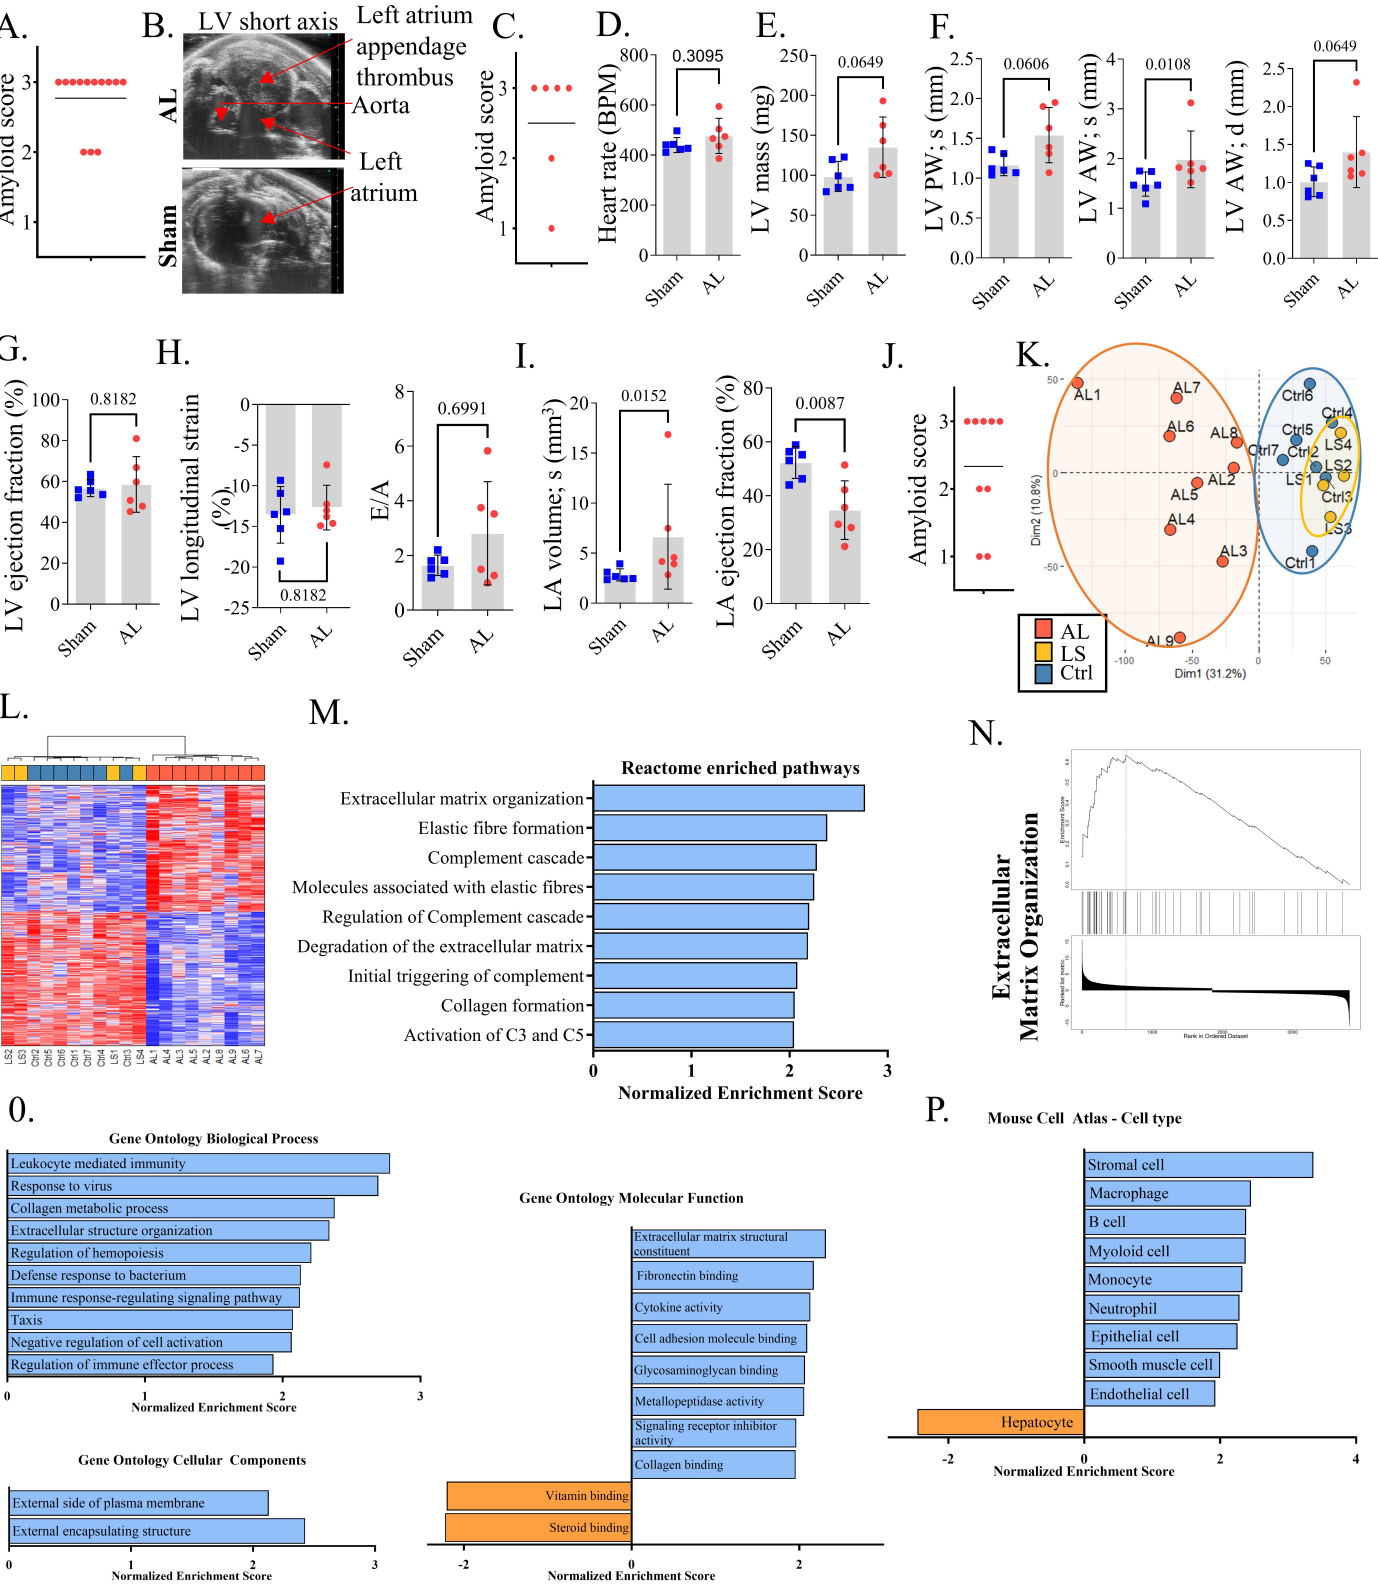



**Supplemental figure 6: Cardiac toxicity analysis.** (A) Cardiac scores from the AL+  $\lambda$ S-DH mice analyzed by plasmatic NT-proBNP dosage (n=13). (B) 4D-Ultrasound image of the left atrium appendage thrombus in the  $\lambda$ S-DH mouse excluded from the analysis. (C) Cardiac scores from the AL+  $\lambda$ S-DH mice analyzed by high resolution echocardiography (n=6). (D) Heart rates in AL+  $\lambda$ S-DH mice (AL, n=6) and control DH mice (Sham, n=6). (E) Calculated left ventricular (LV) mass from control DH (Sham, n=6) and AL+  $\lambda$ S-DH mice (AL, n=6). (F) Posterior Wall (PW) LV thickness measured in systole (s) and Anterior Wall (AW) LV thickness measured in systole and diastole (d). (G) LV ejection fraction calculated by the longitudinal strain analyzed in parasternal long-axis view. (H) Global LV longitudinal peak strain analyzed in parasternal long-axis view and early to late diastolic transmitral flow velocity was given by the ratio E/A. (I) Left atrium (LA) volume evaluated at systole and the calculated left atrial ejection fraction. Comparisons in (D-I) were performed by Mann-Whitney two-sided test. Histograms show individual values with mean  $\pm$  SD. (J) Cardiac scores from the AL+  $\lambda$ S-DH mice analyzed by RNA sequencing (n=9). (K) Principal component analysis showing the distribution of the AL+  $\lambda$ S-DH (AL), AL-  $\lambda$ S-DH (LS) and DH (Ctrl) samples analyzed by RNA sequencing according to the variance in gene expression. (L) Heatmap showing the 2034 DEG ( $|\log_2FC| > 1$ , FDR < 0.05) among the 10059 genes analyzed in the comparison between AL (n=9) and both LS and Ctrl groups (n=11). Mice were clustered according to the DE profiles. Red corresponds to overexpressed genes and blue to downregulated genes. Sample colors match with colors in (J). (M) Reactome enriched pathways of the DEG analysis from (L). (N) Gene Ontology analysis of the DEG according to the biological process (top left), cellular components (bottom left) and molecular function (right). (O) Gene Set Enrichment plot representing the distribution of the 41 DEG related to the extracellular matrix organization reactome pathway. (P) Mouse Cell Atlas analysis showing the cell type enrichment in the cardiac tissue of the DEG. The represented pathways in (M, N, O, P) were significantly enriched (FDR < 0.05).
